# Supplementary material for: Altered Expression of DAAM1 and PREP Induced by Cadmium Toxicity Is Counteracted by Melatonin in the Rat Testis
Source: MDPI journal article supplement (doi:10.3390/genes12071016), 2021-06-30
Supplement: s1 [file s1]

**Table S1.** List of all the used primers and antibodies

| Gene           | GenBank<br>Accession Nr. | Annealing<br>Temperature | Amplicon size<br>(bp) | Primers Sequence                                                       |
|----------------|--------------------------|--------------------------|-----------------------|------------------------------------------------------------------------|
| Daam1          | NM_001108030.1           | 56° C                    | 380                   | For: 5'- CCGAAACAATGACCACCCAG -3'<br>Rev: 5'- GCTTTGTCCTCAGTGCTGTC -3' |
| Prep           | NM_031324.2              | 55° C                    | 392                   | For: 5'- CCCTTATGCTTGGCTTGAAG -3'<br>Rev: 5'- TCATGAACTTGATGGTCACC -3' |
| $\beta$ -Actin | NM_031144.3              | 56° C                    | 300                   | For: 5'- CTCTTCCAGCCTTCCTTCCT -3'<br>Rev: 5'- CTGCTTGCTGATC-CACATC -3' |

| Antibody                            | WB Dilution | IF Dilution | Source                                                       |
|-------------------------------------|-------------|-------------|--------------------------------------------------------------|
| 3 $\beta$ -HSD                      | 1:700       | 1:100       | Elabscience Biotechnology, Wuhan, China<br>#E-AB-15112       |
| $\alpha$ -Tubulin                   | -           | 1:100       | Elabscience Biotechnology, Wuhan, China<br>#E-AB-20036       |
| $\beta$ -Actin                      | 1:5000      | 1:100       | Elabscience Biotechnology, Wuhan, China<br>#E-AB-20031       |
| BAX                                 | 1:250       | -           | Santa-Cruz Biotechnology, Inc., Dallas, TX, USA<br>(#sc-526) |
| DAAM1                               | 1:500       | 1:100       | Elabscience Biotechnology, Wuhan, China<br>#E-AB-13182       |
| PCNA                                | -           | 1:100       | Santa-Cruz Biotechnology, Inc., Dallas, TX, USA<br>#sc-56    |
| PREP                                | 1:3000      | 1:100       | Abcam, Cambridge, UK<br>#ab58988                             |
| StAR                                | 1:500       | -           | Elabscience Biotechnology, Wuhan, China<br>#E-AB-15419       |
| PNA lectin<br>Alexa Fluor 568       | -           | 1:50        | Thermo Fisher Scientific, Waltham, Ma, USA<br>#L32458        |
| Goat anti-rabbit HRP                | 1:5000      | -           | Sigma-Aldrich, Milan, Italy<br>#AP307P                       |
| Goat anti-mouse HRP                 | 1:5000      | -           | Sigma-Aldrich, Milan, Italy<br>#AP130P                       |
| Goat anti-rabbit<br>Alexa Fluor 488 | -           | 1:500       | Thermo Fisher Scientific, Waltham, Ma, USA<br>#A32731        |
| Goat anti-mouse<br>Alexa Fluor 647  | -           | 1:500       | Thermo Fisher Scientific, Waltham, Ma, USA<br>#A21236        |
